# Supplementary material for: Stratification of TAD boundaries reveals preferential insulation of super-enhancers by strong boundaries
Source: PubMed Central journal article supplement (PMC5803259; doi:10.1038/s41467-018-03017-1), 2018-02-07
Supplement: 41467_2018_3017_MOESM3_ESM.pdf [file 41467_2018_3017_MOESM3_ESM.pdf]

## **Description of Additional Supplementary File**

File Name: Supplementary Data 1

Description: Description and accession numbers of Hi-C, CTCF and H3K27ac datasets.
